# Supplementary material for: Dynamics of an Ongoing Wolbachia Spread in the European Cherry Fruit Fly, Rhagoletis cerasi (Diptera: Tephritidae)
Source: Insects. 2019 Jun 14;10(6):172. doi: 10.3390/insects10060172 (PMC6627601; doi:10.3390/insects10060172)
Supplement: Supplementary file 1 [file insects-10-00172-s001.xlsx]

## Sheet: Table S1
Table S1: Detailed overview on the Wolbachia infection status and mitochondrial haplotypes of R. cerasi
Population #	Location	Latitude	Longitude	Host plant	Year	n	wCer2-uninfected	wCer2-infected	% wCer2-uninfected	% wCer2-infected	Haplotype 1 (HT1)	Haplotype 2 (HT2)	wCer2-uninfected/HT1	wCer2-infected/HT2	wCer2-infected/HT1	wCer2-infected/HT2	% wCer2-uninfected/HT1	% wCer2-uninfected/HT2	% wCer2-infected/HT1	% wCer2-infected/HT2
16/1	Dossenheim	49°26'59.72"N	8°38'20.49"E	Prunus avium	2016	16	0	16	0	100	0	16	0	0	0	16	0	0	0	100
16/2	Bensheim	49°42'24.54"N	8°36'34.82"E	P. avium	2016	16	15	1	93.75	6.25	15	1	15	0	0	1	93.75	0	0	6.25
16/3	Stockstadt	49°48'10.88"N	8°28'37.95"E	P. avium	2016	16	13	3	81.25	18.75	13	3	13	0	0	3	81.25	0	0	18.75
16/4	Ober-Ramstadt	49°50'5.58"N	8°44'28.55"E	P. avium	2016	16	15	1	93.75	6.25	15	1	15	0	0	1	93.75	0	0	6.25
16/5	Erbenheim	50° 3'9.27"N	8°18'28.98"E	Lonicera xylosteum	2016	15	14	1	93.3333	6.66667	14	1	14	0	0	1	93.3333	0	0	6.66667
16/6	Idstein	50°13'1.58"N	8°16'42.27"E	L. xylosteum	2016	10	9	1	90	10	9	1	9	0	0	1	90	0	0	10
16/7	Rosbach	50°18'17.87"N	8°41'50.39"E	P. avium	2016	16	16	0	100	0	16	0	16	0	0	0	100	0	0	0
16/8	Hailer	50°11'11.23"N	9°10'1.33"E	P. avium	2016	16	0	16	0	100	0	16	0	0	0	16	0	0	0	100
16/9	Weckesheim	50°21'48.38"N	8°50'37.59"E	P. avium	2016	16	12	4	75	25	12	4	12	0	0	4	75	0	0	25
16/10	Utphe	50°26'13.80"N	8°52'52.22"E	P. avium	2016	16	14	2	87.5	12.5	14	2	14	0	0	2	87.5	0	0	12.5
16/11	Langsdorf	50°29'17.46"N	8°51'28.15"E	P. avium	2016	16	13	3	81.25	18.75	13	3	13	0	0	3	81.25	0	0	18.75
16/12	Lich	50°31'29.59"N	8°49'9.58"E	P. avium	2016	16	16	0	100	0	16	0	16	0	0	0	100	0	0	0
16/13	Gießen/Lonicera	50°35'9.46"N	8°40'42.21"E	L. xylosteum	2016	16	4	12	25	75	6	10	4	0	2	10	25	0	12.5	62.5
16/14	Gießen/Prunus	50°35'8.43"N	8°39'17.40"E	P. avium	2016	16	0	16	0	100	5	11	0	0	5	11	0	0	31.25	68.75
16/15	Lahnau	50°34'47.11"N	8°33'30.34"E	P. avium	2016	16	13	3	81.25	18.75	16	0	13	0	3	0	81.25	0	18.75	0
16/16	Alsfeld	50°45'2.63"N	9°16'46.19"E	L. xylosteum	2016	16	14	2	87.5	12.5	13	3	13	1	0	2	81.25	6.25	0	12.5
16/17	Wallenrod	50°39'56.49"N	9°21'42.11"E	L. xylosteum	2016	16	16	0	100	0	16	0	16	0	0	0	100	0	0	0
16/18	Schlüchtern	50°20'57.92"N	9°32'24.21"E	L. xylosteum	2016	16	10	6	62.5	37.5	10	6	10	0	0	6	62.5	0	0	37.5
16/19	Grossenmoor	50°42'50.76"N	9°39'40.80"E	L. xylosteum	2016	14	12	2	85.7143	14.2857	12	2	12	0	0	2	85.7143	0	0	14.2857
	total					295

## Sheet: Table S2
Table S2: Overview on historic data on the Wolbachia infection status and the mitochondrial genotypes of R. cerasi
Population #	Location	Host plant	Year	n	wCer2-uninfected	wCer2-infected	% wCer2-uninfected	% wCer2-infected	Haplotype 1 (HT1)	Haplotype 2 (HT2)	wCer2-uninfected/HT1	wCer2-uninfected/HT2	wCer2-infected/HT1	wCer2-infected/HT2	% wCer2-uninfected/HT1	% wCer2-uninfected/HT2	% wCer2-infected/HT1	% wCer2-infected/HT2
01/1	Mainz	Prunus avium	2001	10	5	5	50	50	5	5	5	0	0	5	50	0	0	50
01/2	Idstein	Lonicera xylosteum	2001	10	9	1	90	10	9	1	9	0	0	1	90	0	0	10
01/3	Limburg	L. xylosteum	2001	7	7	0	100	0	7	0	7	0	0	0	100	0	0	0
01/4	Giessen	L. xylosteum	2001	10	9	1	90	10	9	1	9	0	0	1	90	0	0	10
01/5	Alsfeld	L. xylosteum	2000	10	5	5	50	50	7	3	5	0	2	3	50	0	20	30
01/6	Steinau	L. xylosteum	2000	15	13	2	86.6667	13.3333	15	0	13	0	2	0	86.6667	0	13.3333	0
08/1	Dossenheim	P. avium	2008	16		16	0	100	0	16				16	0	0	0	100
08/2	Stockstadt/Rhein	P. avium	2008	16	14	2	87.5	12.5	14	2	14			2	87.5	0	0	12.5
08/3	Ober-Ramstadt	P. avium	2008	15	14	1	93.3333	6.66667	14	1	14			1	93.3333	0	0	6.66667
08/4	Ober-Ramstadt	L. xylosteum	2008	15	15		100	0	15	0	15				100	0	0	0
08/5	Mechtildshausen	P. avium	2008	16	16		100	0	16	0	16				100	0	0	0
08/6	Reichelsheim/Beienheim	P. avium	2008	16	14	2	87.5	12.5	14	2	14			2	87.5	0	0	12.5
08/7	Lich	P. avium	2008	16	15	1	93.75	6.25	16	0	15		1		93.75	0	6.25	0
08/8	Giessen	L. xylosteum	2008	16	5	11	31.25	68.75	6	10	5		1	10	31.25	0	6.25	62.5
08/9	Lahnau	L. xylosteum	2008	16	14	2	87.5	12.5	16	0	14		2		87.5	0	12.5	0
14/1	Lich	P. avium	2014	10	10	0	100	0	10	0	10				100	0	0	0
14/2	Heuchelheim	P. avium	2014	10	6	4	60	40	7	3	6		1	3	60	0	10	30
	total			224
